# Supplementary material for: De novo [PSI+] prion formation involves multiple pathways to form infectious oligomers
Source: PubMed Central journal article supplement (PMC5427932; doi:10.1038/s41598-017-00135-6), 2017-03-06
Supplement: 41598_2017_135_MOESM1_ESM.pdf [file 41598_2017_135_MOESM1_ESM.pdf]

Title: *De novo* [PSI<sup>+</sup>] prion formation involves multiple pathways to form infectious oligomers

Authors: Jaya Sharma<sup>1</sup>, Brett Wisniewski<sup>1</sup>, Emily Paulson<sup>2</sup>, Joanna Obaoye<sup>1</sup>, Stephen J. Merrill<sup>2</sup> and Anita L. Manogaran<sup>1\*</sup>

Affiliation: <sup>1</sup>Department of Biological Sciences,  
Marquette University. Milwaukee, WI 53201

<sup>2</sup>Department of Mathematics, Statistics and Computer Science, Marquette  
University, Milwaukee, WI 53201

\*Corresponding author: Anita L. Manogaran

Current mailing address:

Department of Biological Sciences

P.O. Box 1881

Marquette University

Milwaukee, WI 53201-1881

Office: (414) 288-4580

Email: [anita.manogaran@marquette.edu](mailto:anita.manogaran@marquette.edu)

## Supplementary Information Figure Legends

**Supplementary Figure 1. Video - 4D Live cell imaging of the pathway I during *de novo* prion induction.** Timelapse movies of the four cells shown in figure 2a. Movies are 10 frames per second, with each second representing 4 minutes and 30 seconds of time. Movie images were captured in 3D, deconvolved and collapsed.

**Supplementary Figure 2. Video - 4D Live cell imaging of the pathway II during *de novo* prion induction.**

**Supplementary Figure 3. Video - 4D Live cell imaging of the pathway III during *de novo* prion induction.**

**Supplementary Figure 4. Video - 4D Live cell imaging of the pathway IV during *de novo* prion induction.**

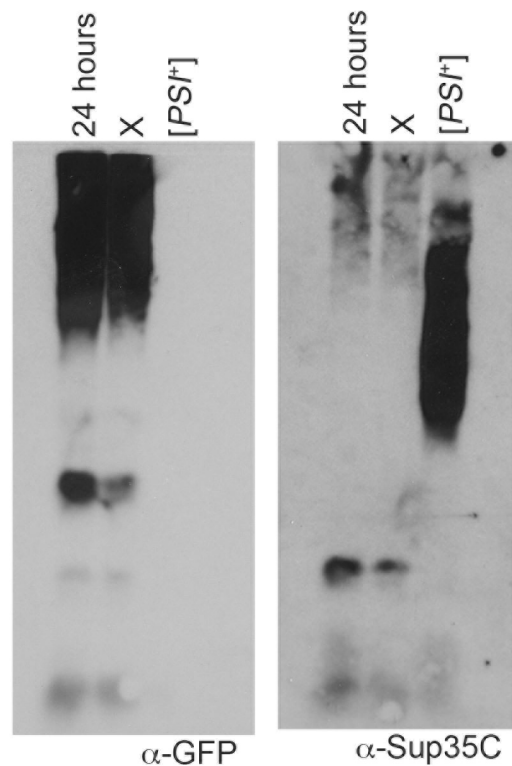

**Supplementary Figure 5. Overexpressed Sup35PrD-GFP and endogenous Sup35p co-migrate as high molecular weight assemblies in culture induced for 24 hours.** Lysates from 24 hour induced cultures in a  $[psi^-][PIN^+]$  background were treated with SDS without boiling. Samples were run on the same SDD-AGE gel (approximately 2%) and separated for immunoblotting. The blots were incubated with either anti-GFP (left) or anti-Sup35C antibody (right). Lysates from  $[PSI^+]$  cultures were run as a control. X indicates a sample unrelated to this study.

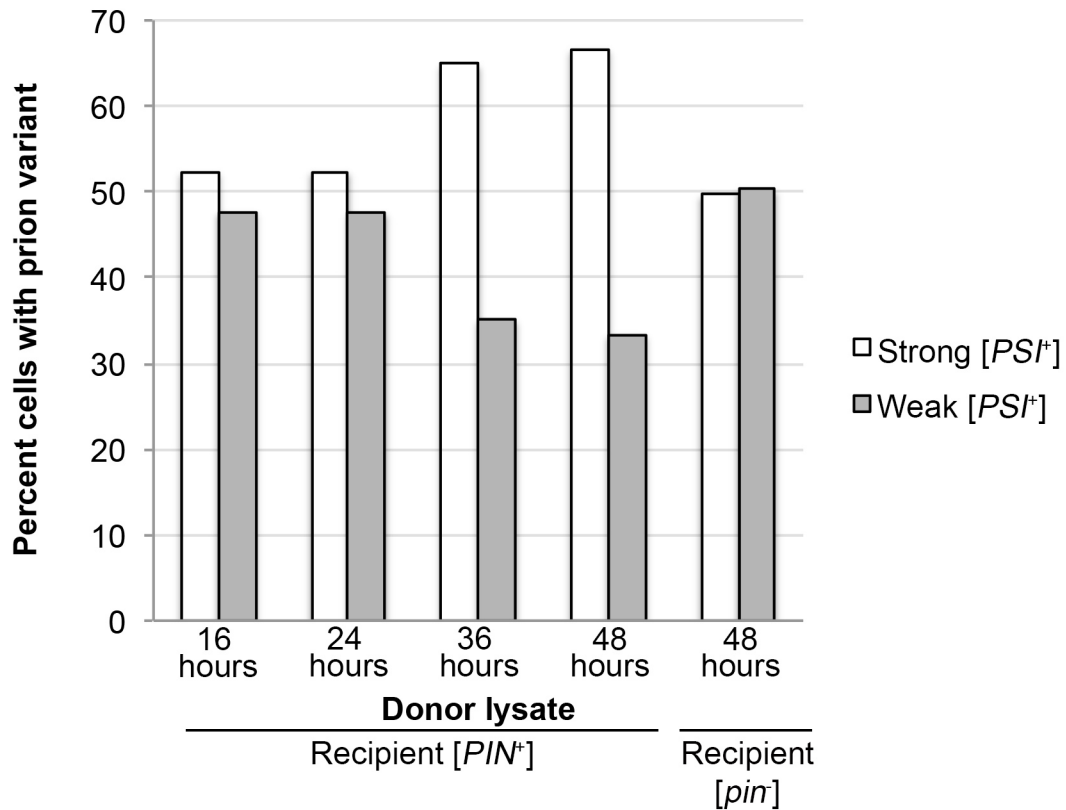

**Supplementary Figure 6. Weak [PSI<sup>-</sup>] variants predominate over strong [PSI<sup>+</sup>] variants when transfected with lysates from cultures with long Sup35PD-GFP overexpression times.** Cells transfected with lysates from figure 5A were further scored for the presence of strong (white bars) and weak (gray bars) [PSI<sup>+</sup>].
